1  
2  
3  
4  
5  
6  
7  
8  
9  
10  
11  
12  
13  
14  
15  
16  
17  
18  
19  
20  
21  
22  
23

## Neuronal Adaptation to the Value Range in the Macaque Orbitofrontal Cortex

Katherine E. Conen<sup>1,2</sup> and Camillo Padoa-Schioppa<sup>1,3,4</sup>

**Manuscript information:** 35 pages, 9 figures, 2 tables, 168 words in Abstract, 510 words in Introduction, 1620 words in Discussion.

**Keywords:** Economic choice, decision making, range adaptation, subjective value, neuronal plasticity

**Affiliations:** <sup>1</sup> *Department of Neuroscience, Washington University in St Louis;* <sup>3</sup> *Department of Economics, Washington University in St Louis;* <sup>4</sup> *Department of Biomedical Engineering, Washington University in St Louis*

**Current address:** <sup>2</sup> *Department of Collective Behavior, Max Planck Institute for Ornithology*

**Correspondence to:** *Camillo Padoa-Schioppa, Ph.D., Department of Neuroscience, Washington University in St Louis, Tel: 314-747-2253, Email: [camillo@wustl.edu](mailto:camillo@wustl.edu)*

**Acknowledgments:** We thank H. Schoknecht for help with animal training and S. Ballesta, W. Shi, and E. Bromberg-Martin for comments on earlier versions of the manuscript. This work was supported by the National Institutes of Health (grant number R01-MH104494 to CPS and grant number F31-MH107111 to KEC).

**Conflict of interest:** None

24 **Abstract**

25 Economic choice involves computing and comparing the subjective values of different options.  
26 The magnitude of these values can vary immensely in different situations. To compensate for  
27 this variability, decision-making neural circuits adapt to the current behavioral context. In  
28 orbitofrontal cortex (OFC), neurons encode the subjective value of offered and chosen goods in  
29 a quasi-linear way. Previous work found that the gain of the encoding is lower when the value  
30 range is wider. However, previous studies did not disambiguate between neurons adapting to  
31 the value range or to the maximum value. Furthermore, they did not examine changes in  
32 baseline activity. Here we investigated how neurons in the macaque OFC adapt to changes in  
33 the value distribution. We found that neurons adapt to both the maximum and the minimum  
34 value, but only partially. Concurrently, the baseline response is higher when the minimum value  
35 is larger. Using a simulated decision circuit, we showed that higher baseline activity increases  
36 choice variability, and thus lowers the expected payoff in high value contexts.

## 37 Introduction

38 Neuronal adaptation takes place throughout the brain. While its function is not fully understood,  
39 in sensory systems adaptation may contribute to homeostatic regulation (Benucci, Saleem, &  
40 Carandini, 2013; Hengen, Lambo, Van Hooser, Katz, & Turrigiano, 2013), efficient perceptual  
41 representation (Adibi, McDonald, Clifford, & Arabzadeh, 2013; Dan, Atick, & Reid, 1996;  
42 Gutnisky & Dragoi, 2008; Lewicki, 2002), and sharper behavioral performance (Krekelberg, van  
43 Wezel, & Albright, 2006; Liu, Macellaio, & Osborne, 2016). Context adaptation has also been  
44 observed in the neuronal representation of subjective values. Studies in non-human primates  
45 found adaptive coding in several brain regions, including orbitofrontal cortex (OFC) (Kobayashi,  
46 Pinto de Carvalho, & Schultz, 2010; Padoa-Schioppa, 2009; Yamada, Louie, Tymula, &  
47 Glimcher, 2018), anterior cingulate cortex (Cai & Padoa-Schioppa, 2014), and the amygdala  
48 (Bermudez & Schultz, 2010; Saez, Saez, Paton, Lau, & Salzman, 2017). In humans,  
49 experiments measuring BOLD activity have shown context adapting value signals in  
50 ventromedial prefrontal cortex (vmPFC), ventral striatum, and other brain areas (Burke,  
51 Baddeley, Tobler, & Schultz, 2016; Cox & Kable, 2014; Elliott, Agnew, & Deakin, 2008). More  
52 recent work has begun to explore the behavioral implications of value adaptation using a  
53 combination of experimental and theoretical approaches. One study found that adaptation in  
54 OFC reduces variability in value-based decisions, increasing the subject's expected payoff  
55 (Rustichini, Conen, Cai, & Padoa-Schioppa, 2017). Other work suggests that value adaptation  
56 on a shorter time scale may produce irrational decision patterns (Soltani, De Martino, &  
57 Camerer, 2012; Yamada et al., 2018).

58 Despite this growing interest, our understanding of value adaptation is incomplete. In particular,  
59 previous studies did not clearly distinguish between neurons adapting to the range of values  
60 and neurons adapting to the maximum value available in a given context (Cox & Kable, 2014;  
61 Kobayashi et al., 2010; Padoa-Schioppa, 2009). Furthermore, these studies focused exclusively  
62 on the gain of value encoding (Cox & Kable, 2014; Kobayashi et al., 2010; Padoa-Schioppa,  
63 2009; Rustichini et al., 2017) and did not examine potential changes in the overall response  
64 (i.e., changes in offset). In this study, we developed a task that allowed us to address these  
65 issues. We focused on the OFC, an area engaged in value-based decisions (Fellows, 2011;  
66 Padoa-Schioppa & Conen, 2017; Rudebeck & Murray, 2014; Schultz, 2015; Wallis, 2012).

67 We examined how value-encoding cells adapt to changes in both the maximum and the  
68 minimum of the value distribution. Neurons adapted to both maximum and minimum values, but

69 responses did not remap completely to the new value range. Importantly, partial remapping  
70 reflected the final adapted state of neurons, not simply an incomplete temporal process. One  
71 byproduct of partial adaptation was an increase in the baseline response in contexts with a  
72 higher minimum value. Simulating a linear decision network, we showed that this change in  
73 baseline activity could increase choice variability, reducing the subject's overall payoff.  
74 However, this theoretical loss is minor compared to the effect of narrowing the dynamic range.  
75 Incomplete adaptation may allow the circuit to maintain information about the overall value of  
76 the context, at the cost of a slight decrease in expected payoff.

## 77 **Results**

78 To measure neuronal adaptation, we trained animals to perform a modified version of a juice  
79 choice task (Fig.1A). The task consisted of 2-3 blocks of ~250 trials. Within each block, the  
80 monkey chose between two juices labeled A and B (with A preferred). The quantity of juice  
81 offered varied pseudo-randomly within a set range, defined by a minimum and maximum value  
82 ( $V_{min}$  and  $V_{max}$ ). In a given block, each juice could be offered in a “high”, “low”, or “wide” range  
83 (Fig.1B). Between blocks, the range of offers for each juice changed in one of six ways:  $V_{max}$   
84 increased / decreased,  $V_{min}$  increased / decreased, or both  $V_{max}$  and  $V_{min}$  increased / decreased  
85 concurrently while ( $V_{max} - V_{min}$ ) remained constant.

86 We analyzed the animals' behavior separately in each trial block. A logistic regression of the  
87 choice pattern provided measures for the relative value ( $\rho$ ) and the sigmoid steepness ( $\eta$ )  
88 (Fig.1CD; see Materials and Methods). Choice patterns generally presented a quality-quantity  
89 tradeoff between the juices (mean( $\rho$ ) = 2.4 across sessions). Within a session,  $\rho$  was strongly  
90 correlated across blocks ( $r = 0.73$ ,  $p = 5.5 \cdot 10^{-35}$ , Pearson correlation; Fig.1E), indicating that the  
91 juice preferences were fairly consistent within a session. Values of  $\rho$  increased slightly in the  
92 second block compared to the first, presumably reflecting the animals' increasing satiety: their  
93 preference shifted toward the preferred juice rather than the higher quantity ( $p = 0.01$ , Wilcoxon  
94 signed rank test). Values of  $\eta$  were also correlated across blocks ( $r = 0.24$ ,  $p = 4.4 \cdot 10^{-4}$ ,  
95 Pearson correlation) but did not differ systematically between the first and second blocks of a  
96 session ( $p = 0.47$ , Wilcoxon signed rank test) (Fig.1F).

97 Choice behavior was weakly affected by the value range (Fig.1GH). In general, relative values  
98 were slightly larger in high and wide range blocks compared to low range blocks (Fig.1G),  
99 reflecting an increase in the relative value of A for higher quantities. High and wide range blocks

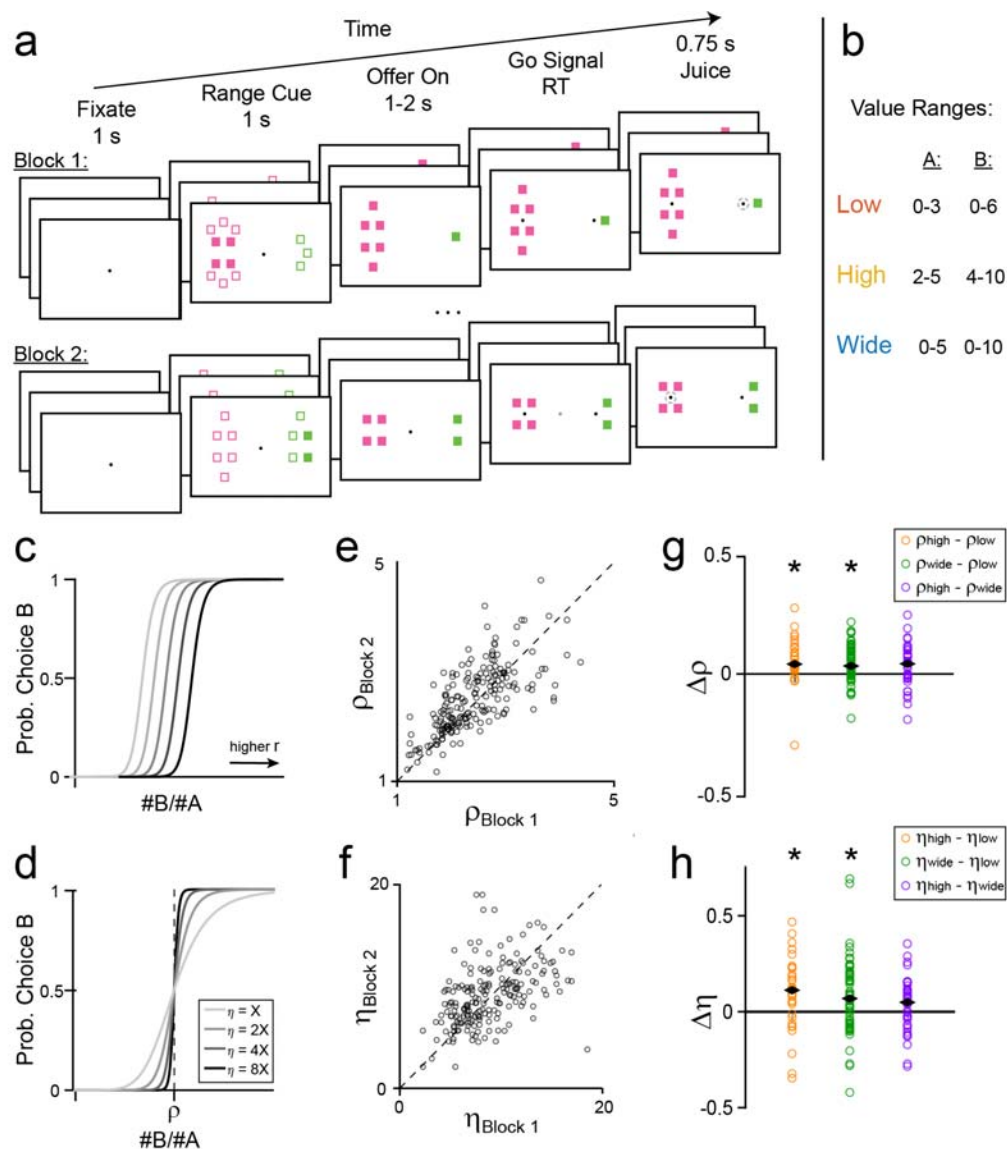

**Figure 1.** Task outline and behavioral results. **(A)** Schematic of a session. The monkey chose between two juices, each associated with one color. The animal initiates each trial by fixating on a central point. After 1s, range cues appear on either side of the central fixation. Filled squares indicate the minimum possible offer for a given juice and total squares indicate the maximum. In this trial, the cue informed the monkey that the quantity of juice B offered would be between 4 and 10 drops, while the quantity of juice A would be between 0 and 3 drops. After 1s, the cues are replaced by two sets of filled squares representing the current offers. In this trial, the animal chose between 1 drop of grape juice and 4 drops of fruit punch. After a variable interval (1-2s), the central fixation disappears, and targets appear next to each offer, cuing the monkey to indicate its choice. The monkey then makes a saccade to one of the targets and holds fixation for 0.75s, after which it receives the chosen juice. Each session consists of 2-3 blocks, each with ~250 trials. Ranges remain constant across trials within each block, and change between blocks. **(B)** Each juice is offered in one of three ranges, “low”, “high”, or “wide”. The two juices can be offered in either the same type of range or different types of range within a block. **(C-H)** Changes in choice behavior across sessions. **(CD)** Illustration of the behavioral response function for changing values of relative value,  $\rho$  (C), or behavioral steepness  $\eta$  (D). Increased  $\rho$  corresponds to a decreased probability of choosing offer B for a given offer ( $\#A:\#B$ ). Increased  $\eta$  corresponds to less variable choice behavior. **(E-H)** Animal behavior across sessions. Each point represents the behavior from one pair of blocks in a session ( $n=205$ ). **(E)** Relative

101 also had steeper sigmoid functions than low range blocks (lower choice variability, Fig.1H). The  
102 sigmoid steepness recorded in low range and wide range blocks was statistically  
103 indistinguishable (Fig.1H). Differences in sigmoid steepness are likely related to the monkeys'  
104 greater motivation in high value blocks (see Discussion).

### 105 Neural responses adapt to both the maximum and minimum value

106 We recorded the activity of 1,262 cells from two monkeys as they performed the choice task  
107 (monkey D, left hemisphere: 480 cells; monkey F, left hemisphere: 373 cells, right hemisphere:  
108 409 cells). We analyzed the activity of these neurons in seven time windows after offer onset. A  
109 "trial type" was defined by two offers and a choice (e.g., [1A:3B, A]). A neuronal response was  
110 defined as the activity of one neuron in one time window as a function of the trial type, pooling  
111 trial types from two blocks. Building on the results of previous studies (Padoa-Schioppa &  
112 Assad, 2006), we identified task-related responses (ANOVA,  $p < 0.05$  in both blocks) and  
113 classified them as encoding one of the variables *offer value A*, *offer value B*, *chosen value*, or  
114 *chosen juice* (see Materials and Methods). In total, 488 neurons encoded a decision-related  
115 variable in at least one time window (monkey D: 248 cells, 51.7%; monkey F: 240 cells, 30.7%).  
116 1,917 responses passed the ANOVA criterion, and 984 of these encoded the *offer value* or the  
117 *chosen value* (Table 1). Of these, 644 value-encoding responses met inclusion criteria for our  
118 analysis of neuronal adaptation (see Materials and Methods).

119 Fig.2 illustrates four potential outcomes for the experiment. First, responses might adapt fully to  
120 changes in both maximum and minimum values (range adaptation; Fig.2A). In this case, the  
121 slope of encoding would be steeper in the low and high ranges compared to the wide range. In  
122 addition, the range of firing rates would be the same in all conditions – the maximum and  
123 minimum values in each condition ( $V_{max}$  and  $V_{min}$ ) would always evoke the same maximum and  
124 minimum responses ( $R_{max}$  and  $R_{min}$ , respectively). Alternatively, neurons might adapt to the

value in the earlier vs. later block of a session. Values of  $\rho$  were strongly correlated across pairs of blocks in a session ( $r = 0.73$ ,  $p = 5.5 \times 10^{-35}$ , Pearson correlation) and slightly elevated in later blocks (median  $\Delta\rho = 0.07$ ;  $p = 0.01$ ). **(F)** Values of  $\eta$  were correlated across blocks ( $r = 0.24$ ,  $p = 4.4 \times 10^{-4}$ , Pearson correlation) but did not differ between the first and second blocks of a session ( $p = 0.47$ , Wilcoxon signed rank test). **(G)** Fractional difference in  $\rho$  across range types. Median differences:  $\rho_{high-p_{low}} = 0.040$  ( $p = 2.3 \times 10^{-4}$ ),  $\rho_{wide-p_{low}} = 0.032$  ( $p = 8.3 \times 10^{-5}$ ),  $\rho_{high-p_{wide}} = 0.041$  ( $p = 0.54$ ). **(H)** Fractional difference in  $\eta$  across range types. Median differences:  $\eta_{high-\eta_{low}} = 0.11$  ( $p = 7.7 \times 10^{-3}$ ),  $\eta_{wide-\eta_{low}} = 0.069$  ( $p = 4.2 \times 10^{-3}$ ),  $\eta_{high-\eta_{wide}} = 0.049$  ( $p = 0.14$ ). Black diamonds indicate median fractional differences, and asterisks indicate significant difference from 0 ( $p < 0.05$ ). All p-values Wilcoxon signed rank test. Fractional difference is defined as the difference in parameter values divided by their sum.



| Response             | Monkey D  | Monkey F  |
|----------------------|-----------|-----------|
| <i>Offer Value A</i> | 242 (160) | 123 (75)  |
| <i>Offer Value B</i> | 116 (78)  | 88 (51)   |
| <i>Chosen Value</i>  | 249 (173) | 166 (107) |
| <i>Chosen Juice</i>  | 578       | 355       |

**Table 1.** Number of responses encoding each variable for Monkeys D and F. Later analyses focused on *offer value* and *chosen value* responses. Values in parenthesis indicate the number of responses that met inclusion criteria.

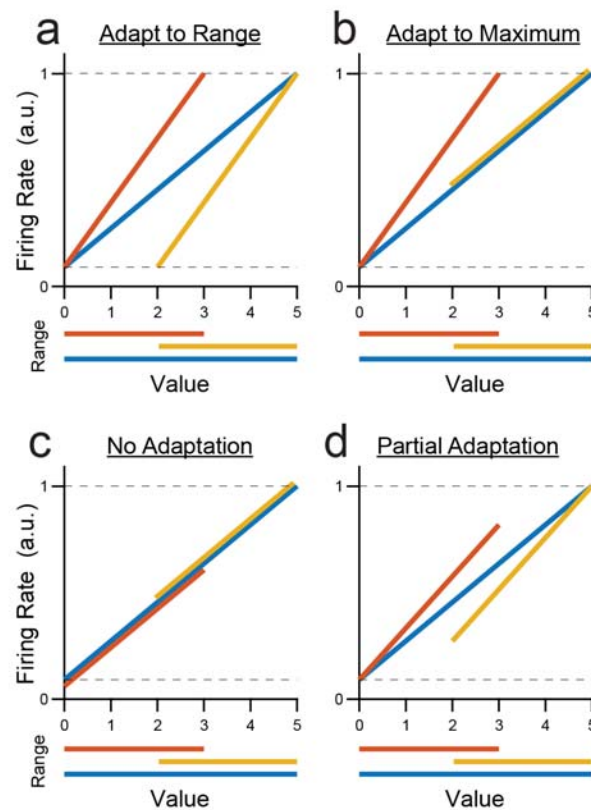

**Figure 2.** Four hypotheses for neuronal adaptation in a hypothetical offer value A response. Red, yellow and blue traces represent neural responses in the low, high, and wide range conditions. Dotted lines represent the absolute minimum and maximum responses observed for the neuron across all conditions. **(A)** Predicted responses if neurons fully adapt to both maximum and minimum values. The slope of encoding is lower in the wide range (blue) compared to the low range (red) or the high range (yellow). The responses to the minimum and maximum values are consistent across all ranges. **(B)** Predicted responses if neurons adapt to changes in maximum, but not minimum value. Encoding is steeper in the low range compared to the high or the wide range. The maximum response is consistent across conditions, but the minimum observed response is higher when the minimum value is larger (high range). **(C)** Predicted response if neurons do not adapt at all. The response function does not change across conditions. Neurons have the same encoding slope across all ranges. The maximum (minimum) response is higher in blocks where the maximum (minimum) value is larger. **(D)** Predicted responses if neurons partially adapt to changes in both maximum value and minimum value. Encoding is steeper in the low and high ranges compared to the wide, but the full dynamic range is not always used. The maximum observed response is lower when the maximum value is smaller (low range). Similarly, the minimum response is higher when the minimum value is larger (high range).

126 maximum value but not to the minimum value (max adaptation; Fig.2B). Conceptually, this  
 127 scenario would occur if values were represented relative to the status quo (i.e., the animal's  
 128 state prior to the decision). In this case, the encoding slope in the high and wide ranges would  
 129 be the same, while the slope in the low range would be steeper. In addition,  $R_{min}$  would be  
 130 elevated in the high value range, reflecting a larger  $V_{min}$ . Notably, adaptation to either the value  
 131 range or the maximum value would be consistent with previous results (Kobayashi et al., 2010;  
 132 Padoa-Schioppa, 2009). Thirdly, neurons might not adapt at all (Fig.2C). Non-adapting  
 133 responses would have the same tuning function in all conditions, but different values of  $R_{max}$  and  
 134  $R_{min}$  would be observed due to the different values sampled in each range. Since previous work  
 135 found adaptation to changes in maximum value, we considered this outcome unlikely, but kept it  
 136 as reference point for our analyses. Finally, neurons might adapt partially to the maximum  
 137 value, the minimum value, or both (Fig.2D). In this case, value encoding would have a steeper

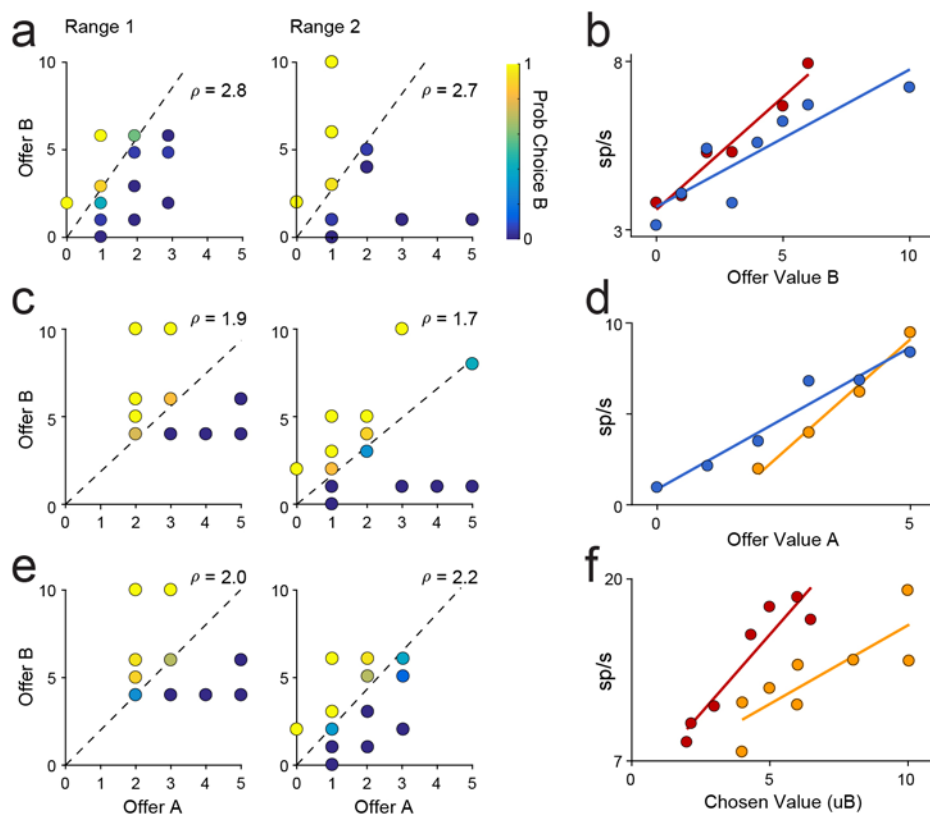

**Figure 3.** Examples of behavior and neuronal activity for three types of range transition. **(A,B)** Increase in maximum value (low  $\rightarrow$  wide). **(C,D)** Decrease in minimum value (high  $\rightarrow$  wide). **(E,F)** Decrease in both (high  $\rightarrow$  low). **(A,C,E)** Choice behavior. Each point represents one offer type. Quantity of offer A is shown on the x-axis and quantity of offer B on the y-axis. The color of each point indicates the fraction of trials in which the animal chose juice B. **(B,D,E)** Neuronal activity across the two blocks. Colors indicate range type (red = low range; yellow = high range; blue = wide range). Responses encode offer value B (B), offer value A (D), and chosen value.



138 slope for the low and high value ranges relative to the wide range, but the range of evoked  
 139 responses would also change across conditions. For example,  $R_{max}$  and  $R_{min}$  would be higher in  
 140 the high range compared to the low range condition, corresponding to higher  $V_{max}$  and  $V_{min}$ .

141 In broad terms, neurons adapt to a parameter if changing that parameter alters their tuning  
 142 functions. We frequently observed adaptation in *offer value* and *chosen value* responses for all  
 143 types of range transition. For example, the cell in Fig.3AB adapted to changes in the maximum  
 144 value of juice B. It encoded *offer value B* in both blocks, but its tuning slope was shallower when  
 145 the maximum value increased. Similarly, the cell in Fig.3CD adapted to changes in the minimum  
 146 value, encoding *offer value A* with a shallower slope when the minimum value decreased. The  
 147 cell in Fig.3EF adapted to changes in both maximum and minimum value. When the range of  
 148 chosen values shifted down, the tuning curve shifted left as firing rates rescaled to the new  
 149 value range. In this case, the encoding slope also increased, reflecting the narrower range of

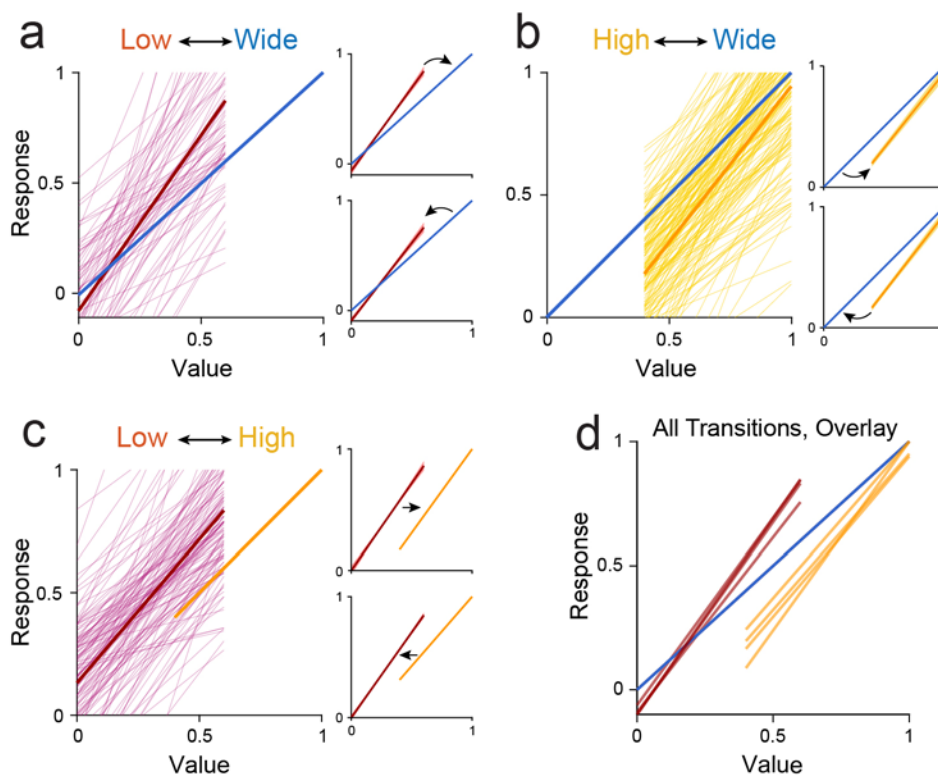

**Figure 4.** Adaptation in offer value responses across each type of range transition. **(A-C)** Individual responses (thin lines) and population mean (thick line) for (A) change in maximum value ( $n = 72$ ); (B) change in minimum value ( $n = 163$ ); and (C) change in both ( $n = 129$ ). Insets show average responses for transitions where  $V_{max}$  and/or  $V_{min}$  increase (top) or decrease (bottom). Shaded region in inset shows mean  $\pm$  SEM. Responses are normalized to the wide range (A,B) or high range (C). Insets in (C) are normalized to the  $V_{max}(\text{high}) - V_{min}(\text{low})$ . **(D)** Overlay of mean responses for all six types of range transition. Transitions from (A) and (B) are aligned to wide range. Transitions from (A) and (C) are aligned to the low range.

150 chosen values in the second block.

151 Across the population, neuronal responses were variable, but they consistently showed  
152 adaptation to both the maximum and minimum value (Fig.4A-C). Notably, neuronal adaptation  
153 was not complete: the range of firing rates differed across range types, indicating that neural  
154 activity did not fully rescale to the range of values available in each trial block. This point can be  
155 seen most clearly in Fig.4D. Although each of the three range types have distinct tuning curves,  
156 the minimum response is higher in the high range condition compared to the other conditions.  
157 Similarly, the maximum response in the low range condition is lower compared to the high and  
158 wide range conditions. This result most closely resembles partial range adaptation (Fig.2D).

### 159 Adaptation involves incomplete rescaling

160 To examine value adaptation quantitatively, we analyzed three features of the response  
161 function: the slope of the encoding, the response to  $V_{max}$ , and the response to  $V_{min}$ .

162 We analyzed changes in the tuning slope in two ways. First, we compared the slope directly  
163 across changes in  $V_{max}$ ,  $V_{min}$ , or both. On average, the slope was larger when the value range  
164 was high or low compared to when the range was wide, consistent with the hypothesis that  
165 neurons adapt to both maximum and minimum values (Fig.5A-C). Responses also showed  
166 slightly higher slopes in the low range relative to the high range condition (Fig.5C). While this  
167 observation is consistent with the idea that responses adapt more to  $V_{max}$  than to  $V_{min}$ , the effect  
168 was driven by *chosen value* responses. *Offer value* responses alone did not show any  
169 difference in slope between the low range and the high range conditions. To interpret changes  
170 of slope in *chosen value* responses, we also need to account for the difference in value range  
171 ( $V_{max} - V_{min}$ ), which varies depending on the animal's choice pattern.

172 To further examine the relationship between slope and value range, we defined Adaptation  
173 Ratios (ARs) for three hypothetical scenarios: adaptation to maximum value ( $AR_{max}$ ), adaptation  
174 to the value range ( $AR_{range}$ ), or no adaptation ( $AR_{none}$ ):

$$175 \quad AR_{max} = (s_1 V_{max,1}) / (s_2 V_{max,2})$$

$$176 \quad AR_{range} = (s_1 \Delta V_1) / (s_2 \Delta V_2)$$

$$177 \quad AR_{none} = s_1 / s_2$$

178 where  $s$  is the encoding slope,  $\Delta V$  is the value range ( $V_{max} - V_{min}$ ), and indices 1 and 2 indicate  
 179 different trial blocks. For high  $\leftrightarrow$  wide or low  $\leftrightarrow$  wide transitions, we defined Block 1 as the wide  
 180 range (ARs are calculated as wide/narrow). For high  $\leftrightarrow$  low transitions, we defined Block 1 as the  
 181 high range (ARs are calculated as high/low). ARs provide a metric for the degree of adaptation.  
 182 If neurons adapt completely to both maximum and minimum values, then  $AR_{range} = 1$ . If they  
 183 adapt to the maximum only, then  $AR_{max} = 1$ . Note that  $AR_{none}$  is simply the ratio of slopes in the  
 184 two conditions, and should be 1 if responses do not adapt. ARs are ambiguous for certain types  
 185 of range transition, For example, when only the maximum value changes,  $AR_{max}$  and  $AR_{range}$  are  
 186 equivalent. In addition, ARs only test the relation between the value range and the tuning slope;  
 187 they are not affected by changes in the intercept of the tuning function. Hence,  $AR = 1$  does not  
 188 imply that responses adapt in a specific way. However,  $AR \neq 1$  indicates that a particular  
 189 hypothesis *does not* fully describe adaptation.

190 Table 2 summarizes the ARs for every type of transition. A few results are noteworthy. First,  
 191  $AR_{none} < 1$  for all range transitions, meaning that adaptation occurred consistently. Similarly,  
 192  $AR_{max} \neq 1$  for transitions where  $V_{min}$  changed alone or where both  $V_{min}$  and  $V_{max}$  changed,  
 193 indicating that responses adapted to changes in both maximum and minimum value. At the  
 194 same time,  $AR_{range} > 1$  when  $V_{min}$  changed alone and when  $V_{max}$  decreased. This finding  
 195 indicates that responses did not fully adapt to changes in either  $V_{max}$  or  $V_{min}$ . Overall, these

| <i>Transition Type</i> | $AR_{max}$ | $AR_{range}$ | $AR_{none}$ | $\Delta R_{max}$   | $\Delta R_{min}$    |
|------------------------|------------|--------------|-------------|--------------------|---------------------|
| <i>Increase Max</i>    | 1.04       | 1.04         | 0.78*       | 0.17* <sup>+</sup> | 0.011               |
| <i>Decrease Max</i>    | 1.13*      | 1.13*        | 0.74*       | 0.22* <sup>+</sup> | 0.060               |
| <i>Increase Min</i>    | 0.83*      | 1.23*        | 0.83*       | 0.029              | -0.20* <sup>+</sup> |
| <i>Decrease Min</i>    | 0.88*      | 1.39*        | 0.88*       | 0.018              | -0.19* <sup>+</sup> |
| <i>Increase Both</i>   | 1.37*      | 1.04         | 0.86*       | 0.22* <sup>+</sup> | 0.17* <sup>+</sup>  |
| <i>Decrease Both</i>   | 1.27*      | 0.94         | 0.82*       | 0.17* <sup>+</sup> | 0.19* <sup>+</sup>  |

**Table 2.** Metrics of adaptation in *offer value* and *chosen value* responses across six types of range transition. Columns 1-3: median Adaptation Ratios calculated for three hypotheses: 1) neurons adapt to max value only, 2) neurons adapt to both max and min, 3) neurons do not adapt. If a hypothesis is true,  $AR = 1$ . Columns 4-5: median normalized difference in  $R_{max}$  and  $R_{min}$  between blocks. Nonzero values indicate a change in neural activity range between sessions (incomplete adaptation). Asterisks (\*) indicate a significant deviation from 1 (columns 1-3) or from 0 (columns 4-5). Plus (+) indicates that the median  $\Delta R_{min}$  or  $\Delta R_{max}$  differs from the value predicted for non-adaptive coding. All  $p < 0.01$ , Wilcoxon signed rank test.

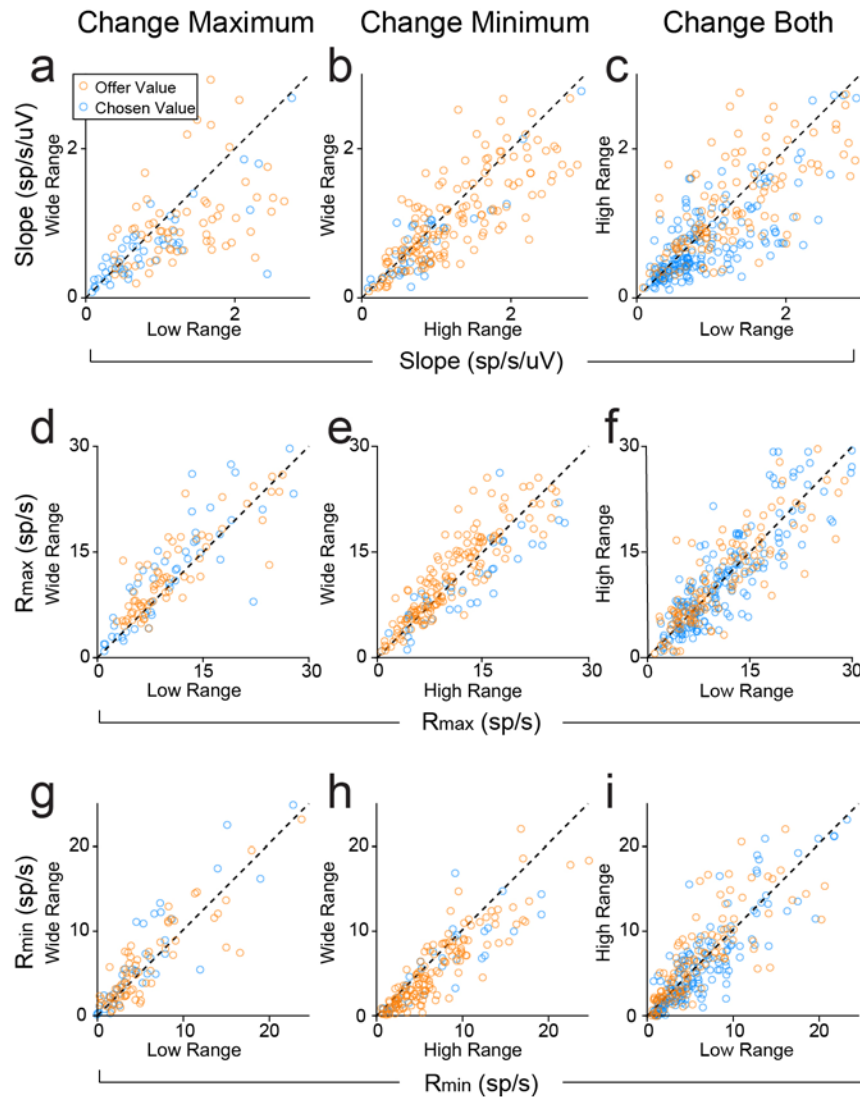

**Figure 5.** Metrics of value adaptation for each type of block transition. Transition type: maximum value changes (ADG,  $n = 121$ ), minimum value changes (BEH,  $n = 206$ ), both change (CFI,  $n = 317$  responses). **(A-C)** Changes in the slope of value encoding of offer value and chosen value responses. Dashed lines show  $y = x$ . Value encoding was generally steeper for low or high value ranges compared to the wide range (high vs. wide:  $p = 1.7 \cdot 10^{-7}$ ; low vs. wide:  $p = 7.3 \cdot 10^{-8}$ ; Wilcoxon signed rank test). When both maximum and minimum values changed, the encoding slope for high and low value ranges was close to the unity line, but slightly higher for the low value range ( $p = 4.3 \cdot 10^{-7}$ , Wilcoxon signed rank test). This effect was driven by chosen value responses. Offer value responses alone did not show such difference ( $p = 0.22$ ). **(D-I)** Cross-block comparisons of  $R_{\max}$  (D-F) and  $R_{\min}$  (G-I) for each type of range transition.  $R_{\max}$  ( $R_{\min}$ ) was generally higher when  $V_{\max}$  ( $V_{\min}$ ) was higher. (D)  $R_{\max, \text{wide}} > R_{\max, \text{low}}$  ( $p = 6.7 \cdot 10^{-6}$ ); 6 points fall outside the limits of the plot. (E)  $R_{\max}$  is not significantly different between high and wide blocks ( $p = 0.058$ ); 14 points fall outside the limits of the plot. (F)  $R_{\max}$  is higher in the high range compared to the low ( $p = 5.4 \cdot 10^{-4}$ ); 16 points outside the limits of the plot. (G)  $R_{\min, \text{wide}} > R_{\min, \text{low}}$  ( $p = 0.026$ ); 6 points fall outside the limits of the plot. (H)  $R_{\min, \text{wide}} < R_{\min, \text{high}}$  ( $p = 6.2 \cdot 10^{-9}$ ); 9 points fall outside the limits of the plot. (I)  $R_{\min, \text{high}} > R_{\min, \text{low}}$  ( $p = 9.2 \cdot 10^{-4}$ ); 8 points fall outside the limits of the plot. Dashed lines show  $y = x$ . All p-values based on Wilcoxon signed rank test.



197 results confirm that responses adapted to both the maximum and minimum values, but that the  
 198 dynamic range did not rescale completely.

199 So far, we have examined changes in the gain of value encoding. However, as Fig.4 illustrates,  
 200 range transitions often led to a shift in the response to  $V_{min}$  ( $R_{min}$ ) and in the response to  $V_{max}$   
 201 ( $R_{max}$ ). To quantify this effect, we compared  $R_{min}$  and  $R_{max}$  across different ranges (Fig.5D-I). In  
 202 general, when  $V_{max}$  ( $V_{min}$ ) was higher,  $R_{max}$  ( $R_{min}$ ) was also higher (all  $p < 10^{-3}$ , Wilcoxon signed  
 203 rank test). Interestingly,  $R_{min}$  was slightly higher in the wide range compared to the low range  
 204 condition, even though  $V_{min}$  was the same (Fig.5G,  $p = 0.026$ , Wilcoxon signed rank test).  $R_{max}$   
 205 did not differ significantly between the wide and the high range conditions, although there was a  
 206 trend toward higher responses in the wide range (Fig.5E,  $p = 0.058$ ). Importantly, although  
 207 responses did not remap completely, our results were inconsistent with the hypothesis of no  
 208 adaptation (Fig.2C). To quantify this point, we computed the normalized change of  $R_{min}$  and  $R_{max}$   
 209 ( $\Delta R_{min}$  and  $\Delta R_{max}$ , respectively) and compared them to the values predicted if neurons did not  
 210 adapt (see Materials and Methods).  $\Delta R_{min}$  and  $\Delta R_{max}$  were consistently lower than the values

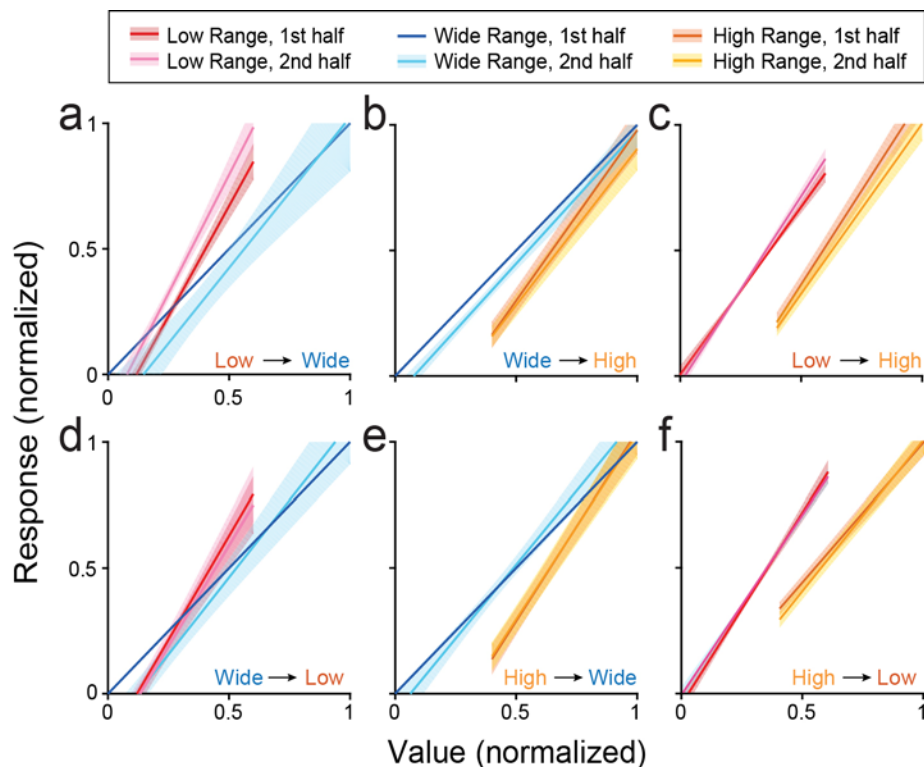

**Figure 6.** Tuning of offer value responses in the first and second half of each block. Transition types: **(A-C)** Increase in maximum (A;  $n = 38$ ), minimum (B;  $n = 64$ ), or both (C;  $n = 76$ ). **(D-F)** Decrease in maximum (D;  $n = 33$ ), minimum (E;  $n = 99$ ), or both (F;  $n = 53$ ). Shaded regions indicate SEM. The first half of each block is shown in lighter colors, the second half in darker colors. Tuning functions are consistent across the early and late halves of the block.



211 predicted for non-adapting cells (Table 2).  
 212 Along with the analysis of response gain, these  
 213 results confirm that value-encoding neurons in  
 214 OFC undergo partial adaptation to changes in  
 215 the value range.

216 The observation of partial rescaling in value-  
 217 encoding responses raised the possibility that  
 218 adaptation was still ongoing during data  
 219 collection. An incomplete temporal process  
 220 could produce the intermediate range  
 221 adaptation observed in Fig.4. To test this  
 222 prospect, we computed the tuning function  
 223 separately in the first and second half of Block  
 224 2. If adaptation was temporally incomplete,  
 225 responses should show greater changes in the  
 226 second half of Block 2 compared to the first  
 227 half. Contrary to this prediction, tuning  
 228 functions for the first and second halves of  
 229 Block 2 were nearly identical for all transition  
 230 types (Fig.6). Statistical analyses confirmed  
 231 that changes in the slope and intercept of the  
 232 tuning function were present within the first half  
 233 of Block 2 (all  $p < 0.01$ , Wilcoxon signed rank  
 234 test). Hence, neuronal adaptation occurred  
 235 relatively quickly after a change in value range,  
 236 and the features of range adaptation described  
 237 above reflect the steady state rather than an  
 238 unfinished transition.

### 239 Adaptation does not affect linearity of tuning

240 Previous work found that value encoding in OFC is quasi-linear, but slightly convex on average  
 241 (Rustichini et al., 2017). We asked whether range adaptation has any effect on this curvature.  
 242 To address this question, we fit each value-encoding response separately with a quadratic

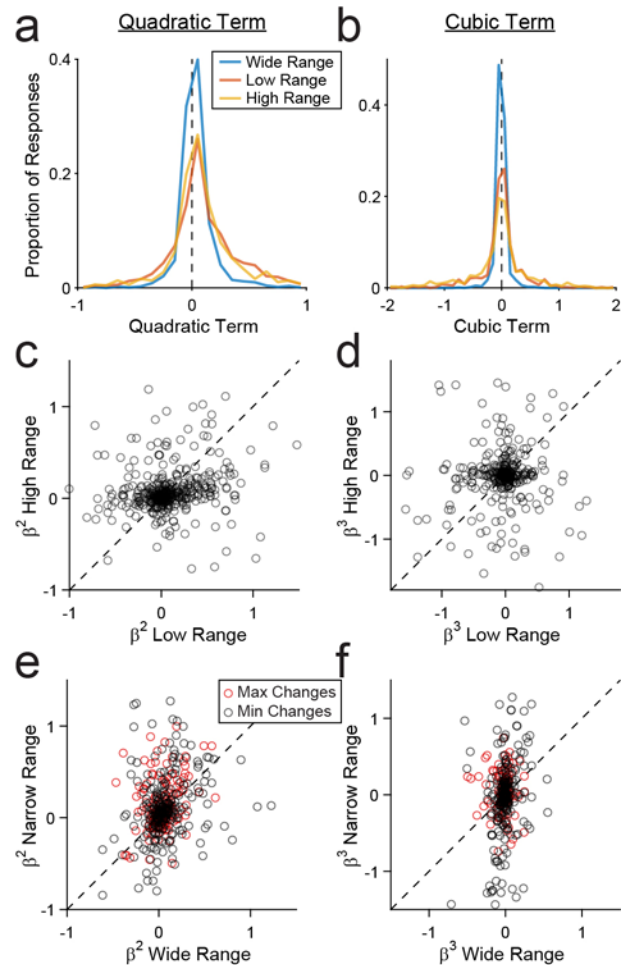

**Figure 7.** Quadratic and cubic tuning parameters. **(A,B)** Distribution of quadratic (A) and cubic (B) coefficients for all value encoding responses in wide, low, and high ranges. **(C-F)** Quadratic and cubic coefficients for individual responses across blocks. Each point represents one response. Dotted lines show  $y=x$ . Correlation ( $r$ ) and  $p$ -values across each transition type: (C)  $r=0.11$ ,  $p=1.6 \cdot 10^{-3}$ ; (D)  $r = 0.048$ ,  $p = 0.33$ ; (E)  $r = 0.39$ ,  $p = 1.4 \cdot 10^{-4}$  (change in  $V_{max}$ );  $r = 0.35$ ,  $p = 1.1 \cdot 10^{-8}$  (change in  $V_{min}$ ); (F)  $r = -0.12$ ,  $p = 0.12$  (change in  $V_{max}$ );  $r = 0.24$ ,  $p = 1.5 \cdot 10^{-4}$  (change in  $V_{min}$ ).

243 polynomial and a cubic polynomial in each range condition. Confirming previous observations,  
244 few responses showed significant quadratic or cubic terms ( $\beta_2$ : 10.6%,  $\beta_3$ : 4.9%;  $p < 0.05$ , F-test).  
245 On average across the population, quadratic terms were slightly positive ( $p = 5.8 \times 10^{-56}$ ,  
246 Wilcoxon signed rank test), while cubic terms were slightly negative ( $p = 1.6 \times 10^{-3}$ , Wilcoxon  
247 signed rank test). Most importantly, the distribution of  $\beta_2$  did not differ between high and low  
248 value ranges (Fig.7A; median values: 0.064, 0.61;  $p = 0.47$ , Wilcoxon rank sum test). Values of  
249  $\beta_2$  were slightly lower in the wide range (median: 0.017;  $p = 9.6 \times 10^{-9}$  vs. high range,  $1.1 \times 10^{-10}$  vs.  
250 low range). However, this difference arose from the fact that the wide range included a greater  
251 number of distinct values, which constrained the polynomial fits. Indeed, when we recalculated  
252 the quadratic fits for the wide range using only the subset of values present in the low range  
253 condition, the distribution of  $\beta_2$  did not differ from the distribution measured with high and low  
254 ranges (median  $\beta_{2,\text{subsampled}} = 0.045$ ; both  $p > 0.1$ ). Similarly, the distribution of  $\beta_3$  did not differ  
255 across high, low, and wide range conditions (Fig.7B; median values: -0.014,  $1.8 \times 10^{-3}$ , and -  
256  $3.8 \times 10^{-3}$ ; all  $p > 0.1$ , Wilcoxon rank sum test).

257 The same pattern of results emerged when we compared  $\beta_2$  and  $\beta_3$  for each response across  
258 blocks (Fig.7C-F). While values of  $\beta_2$  varied substantially, coefficients for each response were  
259 correlated across blocks. This correlation suggests that  $\beta_2$  is a characteristic of each neuron's  
260 tuning function. As in the previous analysis,  $\beta_2$  was slightly higher in narrow ranges compared to  
261 the wide range (Fig.7E), although this was only significant for changes in  $V_{max}$  (median  
262 difference= 0.031,  $p = 1.4 \times 10^{-4}$ , Wilcoxon signed rank test). The effect disappeared when  $\beta_2$  for  
263 the wide range was calculated with sub-sampled values ( $p = 0.39$ ). Values of  $\beta_3$  did not differ  
264 across any type of range transition (all  $p > 0.1$ ) and did not show any consistent pattern of  
265 correlation across blocks.

266 In summary, adaptation altered the gain and offset of value-encoding responses, but not their  
267 quasi-linear functional form.

### 268 *Absence of range adaptation in chosen juice cells*

269 All the results presented so far focused on responses encoding the *offer value* or the *chosen*  
270 *value*. In a separate set of analyses, we examined responses encoding the *chosen juice*.

271 We did not find any evidence of range adaptation in this population. More specifically, we did  
272 not find systematic differences in the encoding slopes (difference in responses to preferred and

273 non-preferred juice) or in the minimum responses, across any range transition (Fig.8, all  $p >$   
274 0.05, Wilcoxon signed rank test). Thus it appears that *chosen juice* responses, capturing the  
275 binary choice outcome, are not affected by changes in the value range.

276 *Non-zero baseline activity in offer value cells impairs simulated choice behavior*

277 We have shown that value-encoding neurons do not rescale completely to changes in value  
278 range. In other words, responses do not span the full range of potential firing rates in every  
279 condition. One important question is whether and how partial adaptation in *offer value* cells  
280 affects economic decisions. This issue is closely related to that of optimality in the neuronal  
281 representation of subjective values.

282 In sensory systems, “optimal tuning” generally refers to the neuronal response function  
283 transmitting maximal information about the stimuli (Barlow, 1961; Laughlin, 1981). In the neural  
284 system underlying economic decisions, this concept of optimality seems less relevant. Instead,

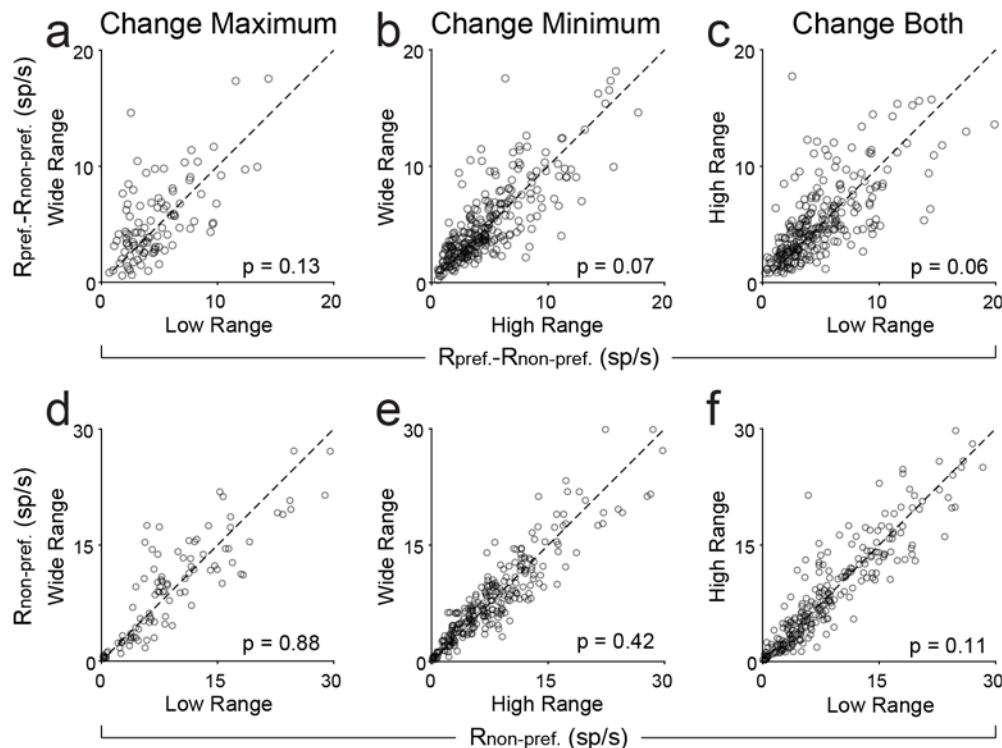

**Figure 8.** Chosen juice responses do not adapt changes in range. **(A-C)** Slope of chosen juice encoding. **(D-F)** Y-intercept (response to the non-preferred juice) for chosen juice responses. Ranges were defined as the range of the preferred juice (i.e. ranges of juice A were used for a chosen juice cell that fired more for choice A). Defining ranges by chosen value or total value range did not alter results. Dashed lines show  $y = x$ . All p-values based on Wilcoxon signed rank test.

285 optimal tuning may be defined as the response function that maximizes the expected payoff  
286 (Rustichini et al., 2017). In our choice task, the payoff is simply the value chosen by the monkey  
287 on any given trial. Notably, while the relative value of two juices is subjective, the payoff of two  
288 options may be compared objectively once the relative value of the juices is known. For  
289 example, if the choice pattern indicates that  $\rho = 2.6$ , then the payoff of 3B is higher than the  
290 payoff of 1A. Importantly, the expected payoff is inversely related to choice variability. When  
291 choice variability is higher – i.e. when decisions between two options are more frequently split –  
292 the animal is more likely to choose the lower value (lower expected payoff). In previous  
293 computational work, we found that a decision network achieved the maximum expected payoff if  
294 *offer value* cells adapted completely to the value range – in other words, if their dynamic range  
295 rescaled fully to the current range of values (Rustichini et al., 2017). However, that study only  
296 considered changes in the slope of the encoding. Moreover, the analysis was limited to  
297 instances where the minimum offer value was zero, and it assumed that the response to the  
298 minimum offer (i.e., the baseline activity) was also zero. Contrary to these assumptions, here we  
299 found that value-encoding responses adapt to the minimum as well as the maximum value.  
300 Furthermore, their baseline activity is non-zero and varies systematically with the value range.

301 To explore the behavioral implications of non-zero, context-dependent baseline activity, we ran  
302 a series of computer simulations. We examined a linear decision model comprised of 5,000  
303 *offer value A* and 5,000 *offer value B* units (see Materials and Methods). Each unit encoded the  
304 value of its preferred juice in a linear way. Trial-to-trial variability was correlated across units,  
305 with correlation values estimated based on empirical measures (Conen & Padoa-Schioppa,  
306 2015). We simulated the choices of this network between pairs of offer values, which were  
307 randomly selected on each trial. The decision was determined based on the activity of the two  
308 pools of *offer value* cells. Thus, on trials where the activity of *offer A* units exceeded that of *offer*  
309 *B* units, juice A was chosen (and vice versa).

310 We examined the choice pattern of this network as the minimum activity level ( $R_{min}$ ) varied. We  
311 specifically considered two scenarios. (1) Each unit had a fixed  $R_{max}$ , such that increasing  $R_{min}$   
312 reduced the available dynamic range (Fig.9A). (2) Each unit had a fixed activity range ( $\Delta R =$   
313  $R_{max} - R_{min}$ ), such that increasing  $R_{min}$  shifted the dynamic range (Fig.9B). In essence, the first  
314 scenario captures the case where neurons do not adapt to changes in the minimum value; the  
315 second scenario is analogous to the partial range adaptation observed in the experiments,  
316 where both  $R_{min}$  and  $R_{max}$  are elevated when the value range shifts up (e.g. Fig.4C). For each

317 scenario, we simulated choices for increasing levels of  $R_{min}$ . Furthermore, we quantified the  
 318 effectiveness of choice behavior using the fractional lost value (FLV), defined as:

$$319 \quad \text{FLV} = \langle \text{max value} - \text{chosen value} \rangle / \langle \text{max value} - \text{chosen value}_{\text{chance}} \rangle$$

320 where *max value* refers to the higher value of the two offers on a given trial, *chosen value*<sub>chance</sub>  
 321 is the average of the two offers, and  $\langle \rangle$  indicates an average across trials. Notably, if a subject  
 322 always chooses the *max value*, FLV = 0; if the subject always chooses randomly, FLV = 1.

323 Fig.9CD illustrates our results. The payoff decreased with increasing values of  $R_{min}$  in both  
 324 scenarios. However, the presence of a baseline firing rate was much more costly when  $R_{max}$   
 325 was fixed (Fig.9C). In the first scenario, FLV increased to 1 as  $R_{min} \rightarrow R_{max}$ , reflecting the  
 326 gradual loss of dynamic range. In contrast, the increasing baseline had a much milder effect

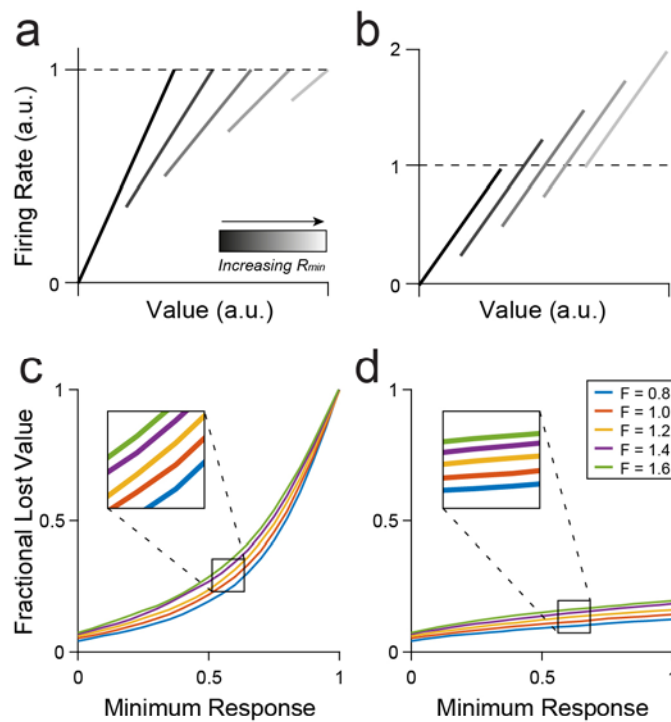

**Figure 9.** Choice simulation. Fractional lost value (FLV) increases with increasing  $R_{min}$ . **(AB)** Illustration of example response functions. **(A)**  $R_{min}$  increases while  $R_{max}$  remains fixed. Analogous to a scenario where units adapt only to the maximum value and the value range shifts higher. **(B)**  $R_{min}$  increases while the value range ( $R_{max} - R_{min}$ ) remains fixed. Analogous to the activity offset associated with partial range adaptation in OFC responses. **(CD)** Simulation results. **(C)** For neurons with a fixed maximum value, FLV increases to 1 (chance level) as the baseline response increases. **(D)** For neurons with a fixed range, FLV increases mildly as baseline activity increases. Trace colors indicate results simulated for different Fano factors. Each curve covers 100 values of  $R_{min}$ , and shows the mean of 20 simulated sessions for each value of  $R_{min}$ .



327 when  $R_{max}$  and  $R_{min}$  increased together (Fig.9D). In this condition  $FLV < 0.25$  even for  $R_{min}$  equal  
328 to or exceeding the total response range.

329 In summary, increasing the baseline response moderately decreases the expected payoff.  
330 However, reducing the dynamic range has a far greater cost.

## 331 **Discussion**

332 We showed that value-encoding neurons in OFC adapt to changes in both the maximum and  
333 the minimum value available in any behavioral context. Notably, while responses showed  
334 consistently higher gain in blocks with a narrow (high or low) value range, neural activity range  
335 did not rescale completely to the current value distribution. The range of firing rates was lower  
336 when the range of values was lower. Thus value encoding fell in an intermediate zone between  
337 fully adaptive coding (range adaptation) and absolute value coding (no adaptation). Importantly,  
338 this result did not reflect an unfinished process of adaptation, as tuning functions reached a  
339 steady state within the first half of each trial block.

340 Our results resonate with previous observations. Kobayashi et al. (2010) measured range-  
341 dependent changes in value-encoding neurons in several sub-regions of OFC. Their analysis  
342 focused on changes in gain. While they divided neurons into adapting, non-adapting, or partially  
343 adapting groups, their results are also consistent with a single population of partially adapting  
344 responses. Along similar lines, in human subjects, Burke et al. (2016) found partial adaptation in  
345 the BOLD signal in ventromedial prefrontal cortex (vmPFC) using a decoding approach. Taken  
346 together, these findings suggest that partial adaptation may be a common characteristic of value  
347 coding in prefrontal cortex.

348 The present study resolves an important ambiguity in our understanding of value coding. We  
349 showed that OFC neurons adapt to the value range rather than to the maximum value alone. In  
350 other words, values are not encoded relative to the subject's pre-decision state. Instead, values  
351 are represented in terms of the best and worst possible outcomes in the current behavioral  
352 context. In addition to this insight, our work highlights the importance of analyzing baseline  
353 neuronal responses, which are often ignored for the sake of simplicity. Indeed, we have shown  
354 that the baseline activity in OFC changes systematically in ways that may affect choice  
355 behavior.

356 Offsets in the activity range are inefficient

357 In a previous study, a simulated decision network yielded the highest payoff when neurons  
358 exploited their full dynamic range (Rustichini et al., 2017). Here, we found that responses do not  
359 span their entire dynamic range in all conditions. Moreover, response functions shift up or down  
360 depending on the value range, which we describe as a change in offset or baseline activity. In a  
361 simulated decision network, higher baseline activity reduces the expected payoff. While this  
362 effect was strongest when the baseline restricted the dynamic range, higher baseline responses  
363 increased FLV even when the maximum response also increased. Intuitively, this inefficiency  
364 arises from the fact that the variance of neural responses scales with the mean. Ceteris paribus,  
365 when a neuron's dynamic range is higher, firing rates are noisier.

366 Given the potential cost of a larger response offset in high value ranges, it is worthwhile to  
367 speculate on the origins and possible benefits of this phenomenon. One possibility is that  
368 neurons adapt to the range of received values rather than to the range of offer values. This  
369 interpretation is supported by results from an fMRI study that found that the BOLD signal in  
370 vmPFC adapted to the range of received – but not observed – outcomes (Burke et al., 2016).  
371 However, this interpretation only accounts for partial adaptation to the minimum value. It cannot  
372 explain the change in response to the maximum value or the fact that intermediate adaptation  
373 was also found in *chosen value* responses.

374 Another possibility is that value adaptation may be affected by the overall task structure. In our  
375 experiments, monkeys were highly trained on the range adaptation task, and they were familiar  
376 with all possible transitions between high, low, and wide ranges. While complete adaptation  
377 would warrant an efficient representation of values within a block, it would also limit the circuit's  
378 ability to respond when the value range changes. In contrast, intermediate adaptation reserves  
379 a portion of the dynamic range for new values that may appear after a transition. This  
380 interpretation suggests that value encoding depends on at least two components: a slow,  
381 learning-based process that draws on contextual knowledge; and a more rapid adaptive  
382 component that adjusts to the locally experienced value range.

383 Finally, intermediate adaptation may allow the circuit to maintain information about the overall  
384 value of the current context (i.e. the value of the block). Information about the current contextual  
385 value makes it possible to predict future reward expectations and affects subjects' motivation to  
386 engage in the task. Moreover, effective value comparison in an adapting network requires

387 information about the distribution of available values as well as neural activity levels on a given  
388 trial. Without some mechanism for maintaining this information, signals are ambiguous across  
389 contexts and cannot guide behavior effectively (Fairhall, Lewen, Bialek, & De Ruyter van  
390 Steveninck, 2001; Rustichini et al., 2017). The differences in response offset observed in OFC  
391 may be used by the network to help distinguish the current value state.

### 392 Possible mechanisms of value adaptation

393 Although our study did not investigate the physiological mechanism of adaptation directly, a few  
394 possibilities may be considered. We showed that value adaptation involves both an additive and  
395 a multiplicative component. While adaptation to the maximum can occur via a simple change in  
396 gain, adaptation to the minimum requires both a change in gain and a horizontal shift in the  
397 response function. When the difference between maximum and minimum values is constant,  
398 adaptation is purely horizontal: the slope of neuronal encoding remains the same, but  
399 responses remap to a new set of values. Additive changes in activity often arise from changes  
400 in hyper-polarization or shunting inhibition (Chance, Abbott, & Reyes, 2002; Holt & Koch, 1997).  
401 Alternate explanations, such as cell-intrinsic changes in membrane conductivity, generally  
402 involve a mixture of additive and multiplicative effects, which is difficult to reconcile with the  
403 purely additive adaptation we observed during high-to-low range transitions (M V Sanchez-  
404 Vives, Nowak, & McCormick, 2000; Maria V Sanchez-Vives, Nowak, & McCormick, 2000). The  
405 multiplicative component of value adaptation could arise from several potential mechanisms.  
406 Changes in gain can be produced by both cell-intrinsic mechanisms, such as changes in ionic  
407 conductance (Díaz-Quesada & Maravall, 2008; Higgs, 2006; Mease, Famulare, Gjorgjieva,  
408 Moody, & Fairhall, 2013), and by circuit-level changes in inhibitory activity (Natan, Rao, &  
409 Geffen, 2017; Olsen, Bortone, Adesnik, & Scanziani, 2012; Wilson, Runyan, Wang, & Sur,  
410 2012) or the background level of synaptic activity (Chance et al., 2002). Short-term depression  
411 (STD) can also induce changes in gain. Although STD generally has a time constant of a few  
412 hundred milliseconds, a longer component lasting tens of seconds has also been observed  
413 (Kohn, 2007; Varela et al., 1997).

414 Recent work examining a more medial region of OFC found that adaptation to simultaneously  
415 presented values was best explained by a divisive normalization model (Yamada et al., 2018).  
416 The data from our study, which reflect a slower form of adaptation across trials, do not appear to  
417 follow a similar model. Among other features, the divisive normalization model predicts a  
418 decrease in the maximum response in conditions with a higher value range, which we do not

419 observe. Notably, that experiment focused on adaptation on a very short time scale (~100 ms).  
420 Another recent model combined slow and fast normalization dynamics to explain variability in  
421 choice behavior across contexts (Zimmerman, Glimcher, & Louie, 2018). One interesting  
422 question is whether this model can also account for the neuronal responses recorded in OFC.  
423 Divisive normalization is a common form of adaptation in sensory regions (Beck, Latham, &  
424 Pouget, 2011; Ohshiro, Angelaki, & DeAngelis, 2011; Olsen, Bhandawat, & Wilson, 2010;  
425 Valerio & Navarro, 2003; Wark, Lundstrom, & Fairhall, 2007), and it is highly effective at  
426 maximizing the transmission of sensory information across a wide variety of stimuli (Carandini &  
427 Heeger, 2011; Simoncelli & Schwartz, 2001). At the same time, divisive normalization seems  
428 less well suited for contextual adaptation in a decision circuit, which ideally would optimize the  
429 choice outcome rather than transmitting maximal information about the value distribution  
430 (Rustichini et al., 2017). Nevertheless, the possible reconciliation of divisive normalization and  
431 range adaptation remains an open question.

#### 432 Discrepancies in behavioral results

433 Our behavioral analyses revealed range-dependent changes in both the relative value and the  
434 sigmoid steepness (Fig.1). The increased relative value in high-value blocks could be explained  
435 if the value of additional juice decreases at higher quantities (diminishing marginal utility). Since  
436 A is generally offered in lower quantity, such a nonlinearity would presumably shift preferences  
437 toward A when the offer quantities increased. The changes in steepness were somewhat more  
438 surprising. A recent analysis of behavior across different ranges found that decision patterns  
439 were generally noisier during blocks with higher maximum values, consistent with the idea  
440 neurons that encoded value with lower resolution during these blocks (Rustichini et al., 2017). In  
441 addition, in our simulations, units with higher baseline activity (analogous to the high value  
442 range) produced noisier choice behavior. Yet, in the experiments, the sigmoid steepness  
443 changed in the opposite direction (steeper choice functions with the wide and high value ranges  
444 compared to the low range). The reason for this discrepancy is unclear, but it may partially  
445 reflect the monkeys' greater motivation during more rewarding blocks. Consistent with this idea,  
446 choices were least variable in the high-value range, slightly more variable in the wide range, and  
447 most variable in the low range. To shed more light on this issue, future work should carefully  
448 match the reward rate across blocks.

449 To conclude, we examined how the neuronal representation in OFC adapted to changes in  
450 maximum and minimum of the value distribution. We found that both maximum and minimum

451 values influence the gain of value encoding, but only partially, leading to an offset in neuronal  
452 activity levels across ranges. Theoretical considerations suggest that partial (as opposed to full)  
453 adaptation should negatively affect choices. Future work should test this prediction.

## 454 **Materials and Methods**

455 All experimental procedures conformed to the NIH Guide for the Care and Use of Laboratory  
456 Animals and were approved by the Animal Studies Committee at Washington University in St.  
457 Louis. Two adult male rhesus macaques (*Macaca mulatta*; D, 11.5 kg; F, 11.0 kg) were used in  
458 the study. Before training, a head-restraint device and a recording chamber were implanted on  
459 the skull under general anesthesia. The recording chamber (main axes, 50 x 30 mm) was  
460 centered on inter-aural coordinates (A30, L0). Structural MRI scans were obtained before and  
461 after implantation and used to guide recording.

### 462 Range adaptation task

463 In this experiment, monkeys performed a variant of a juice choice task used in several previous  
464 studies (Padoa-Schioppa & Assad, 2006). The task was run on custom-written software  
465 (<http://www.monkeylogic.net/>) based on Matlab (MathWorks). Eye position was monitored with  
466 an infrared video camera (Eyelink; SR Research). During the experiments, the monkey sat in an  
467 electrically insulated enclosure (Crist Instruments) with its head fixed. Cues were displayed on a  
468 computer monitor placed 57 cm in front of the animal.

469 Monkeys chose between two juices, A and B, offered in varying quantities. Juice A was defined  
470 as the preferred juice (i.e. 1A was generally chosen over 1B). On each trial, the monkey began  
471 by fixating on a central point. After 1s, cues appeared on each side of the central fixation,  
472 indicating the current range of possible offers. The cues consisted of a set of filled and empty  
473 colored squares. The color of the squares indicated the juice type, the total number of squares  
474 represented the maximum possible offer for that juice in the current trial, and the filled squares  
475 represented the minimum possible offer in that trial (Fig.1A). The cues remained on screen for  
476 1s and were then replaced by a set of solid squares denoting the offers on the current trial. After  
477 a randomly variable delay (1-2 s), the central fixation point disappeared and targets appeared  
478 next to each offer (go signal). The monkey indicated its choice with a saccade to one of the  
479 targets and, after 0.75 s, received the juice corresponding to the chosen offer. If the monkey



480 broke fixation before the go signal appeared or if he failed to fixate the target for 0.75 s after the  
481 saccade, the trial was aborted and the monkey received no reward.

482 Each session consisted of 2-3 blocks, each lasting ~250 trials. The offered quantity varied  
483 pseudo-randomly from trial to trial within a defined range. Within a block, the range of possible  
484 offers was kept consistent for each juice. The monkey could either learn the value range  
485 implicitly through experience or explicitly by use of the range cues. We do not attempt to  
486 distinguish between these possibilities here. Between blocks, the range of available offers for  
487 each juice changed, with three possible ranges for each juice: “high” (2-5 units of juice A or 4-10  
488 units of B), “low” (0-3 uA or 0-6 uB), and “wide” range (0-5 uA or 0-10 uB). Most range  
489 transitions consisted of an increase/decrease in the minimum value ( $V_{min}$ ) while the maximum  
490 value ( $V_{max}$ ) either remained constant or shifted in conjunction with  $V_{min}$ . Note that when  $V_{min}$  and  
491  $V_{max}$  changed together, the difference  $V_{max} - V_{min}$  was kept constant. We counterbalanced the  
492 type of range transition across sessions. In a smaller subset of sessions,  $V_{max}$   
493 increased/decreased while  $V_{min}$  was kept at zero. The ranges of juice A and B could change in  
494 either the same direction or different directions in a given session.

#### 495 Analysis of behavior

496 All analyses were conducted in Matlab (MathWorks). Unless otherwise noted, reported p-values  
497 were calculated using the Wilcoxon signed rank test. Choice behavior was analyzed separately  
498 for each block. We defined the choice pattern as the percent of trials in which the animal chose  
499 juice B as a function of the offer ratio ( $\#B/\#A$ ). We fit the choice pattern to a sigmoid function  
500 using logistic regression:

$$501 \quad P(\text{choice B}) = 1 / (1 + e^{-X})$$

$$502 \quad X = a_0 + a_1 \log(\#B/\#A)$$

503 From this fit, we computed the relative value of the two juices ( $\rho$ ) and the sigmoid steepness ( $\eta$ ):

$$504 \quad \rho = \exp(-a_0/a_1)$$

$$505 \quad \eta = a_1$$

506 We examined changes in  $\rho$  and  $\eta$  as a function of range type. To do so, we compared data for  
507 all pairs of blocks within a session. We recorded during 107 sessions, each of which included 2-  
508 3 range conditions, yielding a total of 236 unique block pairs. Block pairs were excluded from

509 the behavioral analysis if there were <2 offer types with choices split between the two juices (31  
510 block pairs excluded). If there are <2 split offer types, a range of parameters can fit the data  
511 equally well, making it impossible to precisely identify  $\rho$  and  $\eta$ . For the remaining 205 block  
512 pairs, we computed a fractional difference for each parameter across different range types,  
513 where we defined fractional difference the value difference divided by the value sum.

#### 514 Electrophysiology

515 We recorded neuronal data from the central OFC of two monkeys, in a region approximately  
516 corresponding to area 13m (Ongur & Price, 2000) (monkey D: A 31:36, L -6:-10; monkey F: A  
517 31:37 L -6:-11 and 6:11). Recordings were obtained using tungsten electrodes (125  $\mu\text{m}$   
518 diameter; FHC) and 16-channel silicon V-probes (185  $\mu\text{m}$  diameter, 100  $\mu\text{m}$  spacing between  
519 electrodes; Plexon). Electrodes were lowered vertically into position each day using a custom-  
520 built micro-drive (step size: 2.5  $\mu\text{m}$ ). Recording depth was determined ahead of time based on  
521 structural MRI.

522 Electrical signals were amplified (gain: 10,000) and band-pass filtered (low-pass cut-off: 300 Hz,  
523 high-pass cut-off: 6 kHz; Lynx 8, Neuralynx). Action potentials were detected on-line by setting a  
524 threshold during recording, and waveforms crossing the threshold were saved (40 kHz sampling  
525 rate; Power 1401, Cambridge Electronic Design). Spike sorting was conducted off-line using  
526 standard software (Spike 2, Cambridge Electronic Design). Neurons were included in the  
527 analysis if they remained stable and well-isolated in two blocks for at least 120 trials per block.  
528 Responses that were not stably isolated for the full session were only analyzed for the trials in  
529 which they were stable. In the V-probe recordings, spikes from the same neuron were  
530 occasionally picked up by two neighboring contacts. These were detected manually based on  
531 the consistent presence of simultaneous spikes. If units in neighboring channels shared >70%  
532 of spikes, they were considered the duplicates and one of the units was excluded from analysis.

#### 533 Response classification

534 We analyzed cell data in seven time windows following offer onset: post-offer (0.5 s after offer  
535 onset), late-delay (0.5-1.0 s after offer onset), pre-go (0.5 s before the go signal), reaction time  
536 (time from go cue to target acquisition, usually ~200ms), post-juice (0.5 s after juice delivery)  
537 and post-juice 2 (0.5 s to 1s after juice delivery). Data were analyzed independently for each  
538 block. We defined a “trial type” as a set of two offers and the monkey’s choice between them.

539 For example, if the monkey chose B on a trial where he was offered 1A vs. 6B, the trial type  
540 would be [1A : 6B; B]. Task-based neuronal activity was calculated by taking the mean firing  
541 rate for each trial type in each time window. A “neuronal response” was defined as the activity of  
542 one cell in one time window across two blocks. Since we were interested in the effects of  
543 adaptation at steady state, we discarded the first 16 trials of each block before analysis, thereby  
544 excluding trials where the monkey had not yet experienced the full range of values.

545 A response was considered task-related if it passed an ANOVA (factor: trial type;  $p < 0.05$ ) in  
546 both blocks. To classify task-related responses, we regressed each response against the  
547 variables *offer value A*, *offer value B*, *chosen value*, and *chosen juice*. Regressions were  
548 performed separately for each of the two blocks. We classified a response as encoding a  
549 variable if 1) the regression on that variable had a nonzero slope in both blocks ( $p < 0.05$ ) and  
550 2) in cases where more than one option met the first criterion, that variable had the highest total  
551  $R^2$  in the two blocks. Further analyses focused on *offer value* and *chosen value* responses.  
552 Since we were interested in the effects of changing the value distribution, we excluded  
553 responses from analysis if the value range differed by  $< 0.5$  units of value between blocks (132  
554 responses). We also excluded cells with dramatic changes in pre-trial firing rate ( $> 1.6x$  change  
555 during the fixation time window, 208 responses), since large variability in baseline activity could  
556 obscure effects on cell tuning. Including these responses in the analysis added noise but did not  
557 qualitatively alter the results.

558 Most neuronal responses encoded value with a positive slope (i.e. firing rates increased with  
559 value, 71% of responses). For our analyses, we rectified negative encoding responses and  
560 pooled all responses. The goal of rectifying responses is to maintain the same range of  
561 responses and same slope magnitude, but with a positive rather than negative sign. We rectified  
562 the slope ( $s$ ) and intercept ( $b$ ) of negative encoding responses as follows:

$$563 \quad s_{\text{rectified}} = -s_{\text{raw}}$$

$$564 \quad b_{\text{rectified}} = b_{\text{raw}} + s_{\text{raw}} (V_{\text{min}} + V_{\text{max}})$$

565 With this approach, the rectified response covers the same range of firing rates as the original,  
566 but the maximum evoked response now corresponds to  $V_{\text{max}}$  rather than  $V_{\text{min}}$ . We confirmed that  
567 analyses produced qualitatively similar results for positive and negative encoding responses.  
568 Restricting the analysis to neurons with positive encoding did not alter our findings.

569 Normalization of responses for averaging

570 Several figures show average traces of *offer value* response activity normalized so that values  
571 and neural responses vary in the range [0 1]. Unless otherwise specified, these responses were  
572 normalized as follows. For cases where either  $V_{max}$  or  $V_{min}$  change alone:

573 
$$R_{norm} = (R - R_{min,wide}) / (R_{max,wide} - R_{min,wide})$$

574 
$$V_{norm} = (V - V_{min,wide}) / (V_{max,wide} - V_{min,wide})$$

575 For cases where  $V_{max}$  and  $V_{min}$  shift concurrently:

576 
$$R_{norm} = (R - R_{min,low}) / (R_{max,high} - R_{min,low})$$

577 
$$V_{norm} = (V - V_{min,low}) / (V_{max,high} - V_{min,low})$$

578  $R_{norm}$  and  $V_{norm}$  denote normalized responses and values,  $R$  and  $V$  denote the non-normalized  
579 responses and values, and  $R_{max,j}$  and  $R_{min,j}$  indicate the response to  $V_{max}$  and  $V_{min}$  in range type  
580  $j$ .

581 Metrics of adaptation

582 Analysis of adaptation focused on *offer value A*, *offer value B*, and *chosen value* responses. We  
583 grouped responses into three types of range transition: change  $V_{max}$  only, change  $V_{min}$  only, and  
584 change both. Transition types could be divided further based on the direction of change  
585 (increase/decrease). For *offer value* responses, we controlled the value range so that each  
586 transition type was consistent across sessions. Thus if we describe the offer value range as a  
587 fraction of the wide value range ( $\Delta V_{wide}$ ), the normalized ranges were 0-0.6uV (low range), 0.4-  
588 1uV (high range), and 0-1 uV (wide range) for all *offer value* responses. *Chosen value* ranges  
589 depended on the choice pattern of the animal, and in particular the relative value  $\rho$ , which varied  
590 across sessions even when the two juices were identical. For the purposes of this experiment,  
591 we considered the maximum/minimum chosen value changed if the difference between blocks  
592 was greater than  $>0.5$  uB.

593 For each response, we regressed neural activity onto value separately in each block. We  
594 obtained the slope of encoding ( $s$ ) from each fit. Slopes were compared directly across range

595 types, and the relationship between slope and range was tested more precisely using  
596 Adaptation Ratios (see main text). We also used the regression to calculate the responses to  
597 the minimum and maximum values ( $R_{min}$  and  $R_{max}$ ) from the regression:

$$598 \quad R_{min} = s * V_{min} + c$$

$$599 \quad R_{max} = s * V_{max} + c$$

600 where  $V_{min}$  and  $V_{max}$  are the minimum and maximum values in the current block and  $c$  is the  $y$ -  
601 intercept of the linear fit. We computed the normalized difference for conditions where either  
602  $V_{min}$  or  $V_{max}$  change alone:

$$603 \quad \Delta R_{min} = (R_{min,wide} - R_{min,narrow}) / (R_{max,wide} - R_{min,wide})$$

$$604 \quad \Delta R_{max} = (R_{max,wide} - R_{max,narrow}) / (R_{max,wide} - R_{min,wide})$$

605 And for conditions where both change:

$$606 \quad \Delta R_{min} = (R_{min,high} - R_{min,low}) / (R_{max,high} - R_{min,low})$$

$$607 \quad \Delta R_{max} = (R_{max,high} - R_{max,low}) / (R_{max,high} - R_{min,low})$$

608 We also computed the values of  $\Delta R_{min}$  and  $\Delta R_{max}$  that would be predicted if neurons did not  
609 adapt at all (NA). In this case  $\Delta R_{min}$  and  $\Delta R_{max}$  are equivalent to the difference in  $V_{max}$  and  $V_{min}$   
610 across conditions, normalized as above. For example, when either  $V_{max}$  or  $V_{min}$  changes alone:

$$611 \quad \Delta R_{min,NA} = (V_{min,wide} - V_{min,narrow}) / (V_{max,wide} - V_{min,wide})$$

612 For *offer value* responses, changes in  $V_{min}$  and  $V_{max}$  are controlled. Thus, when  $V_{max}$  changes  
613 alone  $\Delta R_{max,NA} = 0.4$  and in  $\Delta R_{min,NA} = 0$ ; when  $V_{min}$  changes alone  $\Delta R_{max,NA} = 0$  and in  $\Delta R_{min,NA} =$   
614  $0.4$ ; and when both change,  $\Delta R_{max,NA} = \Delta R_{min,NA} = 0.4$ . For *chosen value* neurons,  $\Delta R_{max,NA}$  and  
615  $\Delta R_{min,NA}$  depend on the relative value and the animal's choice pattern in each session.

### 616 Analysis of time course

617 To study adaptation in early vs. late trials after the range transition, we took the first and second  
618 half of each block and computed separate tuning functions for each half. Responses were



619 excluded if the slope changed by a factor >5 within the first block (2 responses excluded).  
620 Including these responses did not substantially affect results, but did add noise to the data,  
621 particularly for changes in  $V_{max}$ . Plots of mean tuning curves in the first and second halves of  
622 each block were normalized to the first half of the wide range block.

### 623 Simulations

624 We constructed a linear model of decision making to explore the effect of minimum (baseline)  
625 firing rates on choice behavior. For the purpose of the model, we defined the baseline ( $R_{min}$ ) as  
626 the minimum neural activity in a given block. This value could correspond to either a nonzero  
627 baseline firing rate or to the minimum evoked response in a given context. The model consisted  
628 of a population of 10,000 simulated *offer A* and *offer B* neurons (5000 units per group). Each  
629 unit encoded *offer value* in a linear way, such that the response of unit  $i$  on trial  $t$  was:

$$630 \quad R_{i,t} = V_t * (R_{max} - R_{min}) + R_{min} + y_{i,t}$$

631 where  $R_{min}$  is the baseline activity,  $R_{max}$  is the maximum response of the unit,  $V_t$  is the value of  
632 the encoded juice on trial  $t$ , and  $y_{i,t}$  is a noise term for unit  $i$  on trial  $t$ . Units of  $R$  and  $V$  are  
633 arbitrary.

634 Importantly, *offer value* neurons in OFC show small but significant noise correlations ( $r_{noise}$ )  
635 (Conen & Padoa-Schioppa, 2015). We generated a realistic correlation matrix  $Q$  for the  
636 population as described previously (Conen & Padoa-Schioppa, 2015; Hardin, Garcia, & Golan,  
637 2013). We set  $\text{mean}(r_{noise}) = 0.01$  for units encoding the same juice and  $\text{mean}(r_{noise}) = 0$  for units  
638 encoding different juices. To generate the vector of noise terms  $y_t$  for the population on each  
639 trial, we generated values of uncorrelated noise  $u_t \sim N(0, 1)$ . This was multiplied by the  
640 correlation matrix and scaled according to the Fano factor ( $F$ ) and the mean response for the  
641 current offer type ( $\langle R_V \rangle$ ) to obtain  $y_t$ :

$$642 \quad y_t = Q u_t \langle R_V \rangle (F)^{0.5}$$

643 the scaling factor  $\langle R_V \rangle (F)^{0.5}$  accounts the observation that the variance in firing rate is  
644 proportional to the mean response.

645 Using this model, we simulated choice behavior for increasing values of  $R_{min}$ . We considered  
646 two scenarios: 1) units had a fixed  $R_{max}$ , or 2) units had a fixed activity range ( $R_{max} - R_{min}$ ). For

647 convenience, we defined  $R_{max} = 1$  for the first scenario and  $(R_{max} - R_{min}) = 1$  for the second.  
648 Each simulation consisted of 1000 trials, and the decision on each trial was determined by the  
649 difference in the net activity of the *offer value A* and *offer value B* units. The value of each juice  
650 for a given trial was a randomly chosen integer ranging from 0 to 10. In both scenarios, we  
651 simulated the choice pattern for the neural population as values of  $R_{min}$  increased from 0 to 1 in  
652 increments of 0.01. We repeated the process for five different values of  $F$  and ran the simulation  
653 20 times for each value of  $F$  and  $R_{min}$ . As in a previous study (Rustichini et al., 2017), we  
654 measured the effectiveness of choice behavior using fractional lost value (FLV):

$$655 \quad \text{FLV} = \langle \text{max value} - \text{chosen value} \rangle / \langle \text{max value} - \text{chosen value}_{\text{chance}} \rangle$$

656 where [max value] refers to the higher value of the two offers on a given trial and [chosen  
657 value<sub>chance</sub>] is the average of the two offers. If a subject always chooses the max value, FLV = 0;  
658 if they choose randomly, FLV = 1.

659 **References**

- 660 Adibi, M., McDonald, J. S., Clifford, C. W. G., & Arabzadeh, E. (2013). Adaptation improves  
661 neural coding efficiency despite increasing correlations in variability. *Journal of*  
662 *Neuroscience*, 33(5), 2108–2120. <https://doi.org/10.1523/JNEUROSCI.3449-12.2013>
- 663 Barlow, H. B. (1961). Possible Principles Underlying the Transformations of Sensory Messages.  
664 In W. A. Rosenblith (Ed.), *Sensory Communication* (pp. 217–234). Cambridge, MA: MIT  
665 Press. <https://doi.org/10.7551/mitpress/9780262518420.003.0013>
- 666 Beck, J. M., Latham, P. E., & Pouget, A. (2011). Marginalization in neural circuits with divisive  
667 normalization. *Journal of Neuroscience*, 31(43), 15310–15319.  
668 <https://doi.org/10.1523/JNEUROSCI.1706-11.2011>
- 669 Benucci, A., Saleem, A. B., & Carandini, M. (2013). Adaptation maintains population  
670 homeostasis in primary visual cortex. *Nature Neuroscience*, 16(6), 724–729.  
671 <https://doi.org/10.1038/nn.3382>
- 672 Bermudez, M. A., & Schultz, W. (2010). Reward Magnitude Coding in Primate Amygdala  
673 Neurons. *Journal of Neurophysiology*, 104(6), 3424–3432.  
674 <https://doi.org/10.1152/jn.00540.2010>
- 675 Burke, C. J., Baddeley, M., Tobler, P. N., & Schultz, W. (2016). Partial adaptation of obtained  
676 and observed value signals preserves information about gains and losses. *Journal of*  
677 *Neuroscience*, 36(39), 10016–10025. <https://doi.org/10.1523/JNEUROSCI.0487-16.2016>
- 678 Cai, X., & Padoa-Schioppa, C. (2014). Contributions of orbitofrontal and lateral prefrontal  
679 cortices to economic choice and the good-to-action transformation. *Neuron*, 81(5), 1140–  
680 1151. <https://doi.org/10.1016/j.neuron.2014.01.008>
- 681 Carandini, M., & Heeger, D. J. (2011). Normalization as a canonical neural computation. *Nature*  
682 *Reviews Neuroscience*, 13(1), 51–62. <https://doi.org/10.1038/nrn3136>
- 683 Chance, F. S., Abbott, L. F., & Reyes, A. D. (2002). Gain modulation from background synaptic  
684 input. *Neuron*, 35(4), 773–782. [https://doi.org/10.1016/S0896-6273\(02\)00820-6](https://doi.org/10.1016/S0896-6273(02)00820-6)
- 685 Conen, K. E., & Padoa-Schioppa, C. (2015). Neuronal variability in orbitofrontal cortex during  
686 economic decisions. *Journal of Neurophysiology*, 114(3), 1367–1381.  
687 <https://doi.org/10.1152/jn.00231.2015>
- 688 Cox, K. M., & Kable, J. W. (2014). BOLD subjective value signals exhibit robust range  
689 adaptation. *Journal of Neuroscience*, 34(49), 16533–16543.

- 690 <https://doi.org/10.1523/JNEUROSCI.3927-14.2014>
- 691 Dan, Y., Atick, J. J., & Reid, R. C. (1996). Efficient coding of natural scenes in the lateral  
692 geniculate nucleus: experimental test of a computational theory. *Journal of Neuroscience*,  
693 16(10), 3351–3362.
- 694 Díaz-Quesada, M., & Maravall, M. (2008). Intrinsic mechanisms for adaptive gain rescaling in  
695 barrel cortex. *Journal of Neuroscience*, 28(3), 696–710.  
696 <https://doi.org/10.1523/JNEUROSCI.4931-07.2008>
- 697 Elliott, R., Agnew, Z., & Deakin, J. F. W. (2008). Medial orbitofrontal cortex codes relative rather  
698 than absolute value of financial rewards in humans. *European Journal of Neuroscience*,  
699 27(9), 2213–2218. <https://doi.org/10.1111/j.1460-9568.2008.06202.x>
- 700 Fairhall, A. L., Lewen, G. D., Bialek, W., & De Ruyter van Steveninck, R. R. (2001). Efficiency  
701 and ambiguity in an adaptive neural code. *Nature*, 412(6849), 787–792.  
702 <https://doi.org/10.1038/35090500>
- 703 Fellows, L. K. (2011). Orbitofrontal contributions to value-based decision making: Evidence from  
704 humans with frontal lobe damage. *Annals of the New York Academy of Sciences*, 1239(1),  
705 51–58. <https://doi.org/10.1111/j.1749-6632.2011.06229.x>
- 706 Gutnisky, D. A., & Dragoi, V. (2008). Adaptive coding of visual information in neural populations.  
707 *Nature*, 452(7184), 220–224. <https://doi.org/10.1038/nature06563>
- 708 Hardin, J., Garcia, S. R., & Golan, D. (2013). A method for generating realistic correlation  
709 matrices. *Annals of Applied Statistics*, 7(3), 1733–1762. [https://doi.org/10.1214/13-](https://doi.org/10.1214/13-AOAS638)  
710 [AOAS638](https://doi.org/10.1214/13-AOAS638)
- 711 Hengen, K. B., Lambo, M. E., Van Hooser, S. D., Katz, D. B., & Turrigiano, G. G. (2013). Firing  
712 rate homeostasis in visual cortex of freely behaving rodents. *Neuron*, 80(2), 335–342.  
713 <https://doi.org/10.1016/J.NEURON.2013.08.038>
- 714 Higgs, M. H. (2006). Diversity of gain modulation by noise in neocortical neurons: regulation by  
715 the slow afterhyperpolarization conductance. *Journal of Neuroscience*, 26(34), 8787–8799.  
716 <https://doi.org/10.1523/JNEUROSCI.1792-06.2006>
- 717 Holt, G. R., & Koch, C. (1997). Shunting inhibition does not have a divisive effect on firing rates.  
718 *Neural Computation*, 9(5), 1001–1013. <https://doi.org/10.1162/neco.1997.9.5.1001>
- 719 Kobayashi, S., Pinto de Carvalho, O., & Schultz, W. (2010). Adaptation of reward sensitivity in  
720 orbitofrontal neurons. *Journal of Neuroscience*, 30(2), 534–544.

- 721 <https://doi.org/10.1523/JNEUROSCI.4009-09.2010>
- 722 Kohn, A. (2007). Visual adaptation: physiology, mechanisms, and functional benefits. *Journal of*  
723 *Neurophysiology*, 97, 3155–3164. <https://doi.org/10.1152/jn.00086.2007>
- 724 Krekelberg, B., van Wezel, R. J. A., & Albright, T. D. (2006). Adaptation in macaque MT reduces  
725 perceived speed and improves speed discrimination. *Journal of Neurophysiology*, 95(1),  
726 255–270. <https://doi.org/10.1152/jn.00750.2005>
- 727 Laughlin, S. (1981). A simple coding procedure enhances a neuron's information capacity.  
728 *Zeitschrift Fur Naturforschung C*, 36, 910–912. <https://doi.org/10.1515/znc-1981-9-1040>
- 729 Lewicki, M. S. (2002). Efficient coding of natural sounds. *Nature Neuroscience*, 5(4), 356–363.  
730 <https://doi.org/10.1038/nn831>
- 731 Liu, B., Macellaio, M. V., & Osborne, L. C. (2016). Efficient sensory cortical coding optimizes  
732 pursuit eye movements. *Nature Communications*, 7, 12759.  
733 <https://doi.org/10.1038/ncomms12759>
- 734 Mease, R. A., Famulare, M., Gjorgjieva, J., Moody, W. J., & Fairhall, A. L. (2013). Emergence of  
735 adaptive computation by single neurons in the developing cortex. *Journal of Neuroscience*,  
736 33(30), 12154–12170. <https://doi.org/10.1523/JNEUROSCI.3263-12.2013>
- 737 Natan, R. G., Rao, W., & Geffen, M. N. (2017). Cortical interneurons differentially shape  
738 frequency tuning following adaptation. *Cell Reports*, 21(4), 878–890.  
739 <https://doi.org/10.1016/j.celrep.2017.10.012>
- 740 Ohshiro, T., Angelaki, D. E., & DeAngelis, G. C. (2011). A normalization model of multisensory  
741 integration. *Nature Neuroscience*, 14(6), 775–782. <https://doi.org/10.1038/nn.2815>
- 742 Olsen, S. R., Bhandawat, V., & Wilson, R. I. (2010). Divisive normalization in olfactory  
743 population codes. *Neuron*, 66(2), 287–299.  
744 <https://doi.org/10.1016/J.NEURON.2010.04.009>
- 745 Olsen, S. R., Bortone, D. S., Adesnik, H., & Scanziani, M. (2012). Gain control by layer six in  
746 cortical circuits of vision. *Nature*, 483(7387), 47–52. <https://doi.org/10.1038/nature10835>
- 747 Ongur, D., & Price, J. (2000). The organization of networks within the orbital and medial  
748 prefrontal cortex of rats, monkeys and humans. *Cerebral Cortex*, 10(3), 206–219.  
749 <https://doi.org/10.1093/cercor/10.3.206>
- 750 Padoa-Schioppa, C. (2009). Range-adapting representation of economic value in the  
751 orbitofrontal cortex. *Journal of Neuroscience*, 29(44), 1404–14014.



- 752 <https://doi.org/10.1523/JNEUROSCI.3751-09.2009>
- 753 Padoa-Schioppa, C., & Assad, J. A. (2006). Neurons in the orbitofrontal cortex encode  
754 economic value. *Nature*, *441*(7090), 223–226. <https://doi.org/10.1038/nature04676>
- 755 Padoa-Schioppa, C., & Conen, K. E. (2017). Orbitofrontal cortex: a neural circuit for economic  
756 decisions. *Neuron*. <https://doi.org/10.1016/j.neuron.2017.09.031>
- 757 Rudebeck, P. H., & Murray, E. A. (2014). The orbitofrontal oracle: cortical mechanisms for the  
758 prediction and evaluation of specific behavioral outcomes. *Neuron*, *84*(6), 1143–1156.  
759 <https://doi.org/10.1016/j.neuron.2014.10.049>
- 760 Rustichini, A., Conen, K. E., Cai, X., & Padoa-Schioppa, C. (2017). Optimal coding and  
761 neuronal adaptation in economic decisions. *Nature Communications*, *8*(1).  
762 <https://doi.org/10.1038/s41467-017-01373-y>
- 763 Saez, R. A., Saez, A., Paton, J. J., Lau, B., & Salzman, C. D. (2017). Distinct roles for the  
764 amygdala and orbitofrontal cortex in representing the relative amount of expected reward.  
765 *Neuron*, *95*(1), 70–77.e3. <https://doi.org/10.1016/j.neuron.2017.06.012>
- 766 Sanchez-Vives, M. V, Nowak, L. G., & McCormick, D. A. (2000). Cellular mechanisms of long-  
767 lasting adaptation in visual cortical neurons in vitro. *Journal of Neuroscience*, *20*(11),  
768 4286–4299. <https://doi.org/10.1523/JNEUROSCI.4286-00.2000> [pii]
- 769 Sanchez-Vives, M. V, Nowak, L. G., & McCormick, D. A. (2000). Membrane mechanisms  
770 underlying contrast adaptation in cat area 17 in vivo. *Journal of Neuroscience*, *20*(11),  
771 4267–4285. <https://doi.org/10.1523/JNEUROSCI.4267-00.2000> [pii]
- 772 Schultz, W. (2015). Neuronal reward and decision signals: from theories to data. *Physiological*  
773 *Reviews*, *95*(3), 853–951. <https://doi.org/10.1152/physrev.00023.2014>
- 774 Simoncelli, E. P., & Schwartz, O. (2001). Natural sound statistics and divisive normalization in  
775 the auditory system. *Advances in Neural Information Processing Systems*, *13*, 27–30.
- 776 Soltani, A., De Martino, B., & Camerer, C. (2012). A range-normalization model of context-  
777 dependent choice: a new model and evidence. *PLoS Computational Biology*, *8*(7),  
778 e1002607. <https://doi.org/10.1371/journal.pcbi.1002607>
- 779 Valerio, R., & Navarro, R. (2003). Optimal coding through divisive normalization models of V1  
780 neurons. In *Network: Computation in Neural Systems* (Vol. 14, pp. 579–593).  
781 <https://doi.org/10.1088/0954-898X/14/3/310>
- 782 Varela, J. A., Sen, K., Gibson, J., Fost, J., Abbott, L. F., & Nelson, S. B. (1997). A quantitative

- 783 description of short-term plasticity at excitatory synapses in layer 2/3 of rat primary visual  
784 cortex. *Journal of Neuroscience*, 17(20), 7926–7940.  
785 <https://doi.org/10.1523/JNEUROSCI.17-20-07926.1997>
- 786 Wallis, J. D. (2012). Cross-species studies of orbitofrontal cortex and value-based decision-  
787 making. *Nature Neuroscience*, 15(1), 13–19. <https://doi.org/10.1038/nn.2956>
- 788 Wark, B., Lundstrom, B. N., & Fairhall, A. (2007). Sensory adaptation. *Current Opinion in*  
789 *Neurobiology*, 17(4), 423–429. <https://doi.org/10.1016/j.conb.2007.07.001>
- 790 Wilson, N. R., Runyan, C. A., Wang, F. L., & Sur, M. (2012). Division and subtraction by distinct  
791 cortical inhibitory networks in vivo. *Nature*, 488(7411), 343–348.  
792 <https://doi.org/10.1038/nature11347>
- 793 Yamada, H., Louie, K., Tymula, A., & Glimcher, P. W. (2018). Free choice shapes normalized  
794 value signals in medial orbitofrontal cortex. *Nature Communications*, 9(1).  
795 <https://doi.org/10.1038/s41467-017-02614-w>
- 796 Zimmerman, J., Glimcher, P., & Louie, K. (2018). Multiple timescales of normalized value coding  
797 underlie adaptive choice behavior. *Nature Communications*, 9, 3206.  
798 <https://doi.org/10.1038/s41467-018-05507-8>
